# Supplementary material
Source: Springer Nature journal article supplement (https://www.springermedizin.de/resource/supplementary/12916_2013_981_MOESM6_ESM.pdf/9598756)
Supplement: MOESM6 [file 9598756]

**Supplementary Table 6:** Differential mRNA expression ( $q < 0.05$ ) of candidate genes for type 2 diabetes (T2D) in human pancreatic islets exposed to palmitate versus control. DNA methylation data is displayed if the absolute difference in DNA methylation  $\geq 3\%$  and  $P < 0.05$ .

| T2D candidate genes | mRNA expression |     |                       |                         |                         |         |         | DNA methylation (%) |                |                       |                         |                         |         |
|---------------------|-----------------|-----|-----------------------|-------------------------|-------------------------|---------|---------|---------------------|----------------|-----------------------|-------------------------|-------------------------|---------|
|                     | Probe ID        | Chr | Control mean $\pm$ sd | Palmitate mean $\pm$ sd | Diff. palmitate-control | P-value | q-value | Probe ID            | Region         | Control mean $\pm$ sd | Palmitate mean $\pm$ sd | Diff. palmitate-control | P-value |
| <i>CDKN2A</i>       | 8160441         | 9   | 81.2 $\pm$ 12.7       | 99.6 $\pm$ 16.4         | 18.34                   | 0.0024  | 0.041   |                     |                |                       |                         |                         |         |
| <i>GLIS3</i>        | 8159900         | 9   | 441.4 $\pm$ 66.2      | 394.9 $\pm$ 47.8        | -46.51                  | 0.0012  | 0.027   | cg14641122          | Body; Open sea | 33.4 $\pm$ 8.2        | 36.7 $\pm$ 9.3          | 3.2                     | 0.010   |
|                     |                 |     |                       |                         |                         |         |         | cg14269813          | Body; Open sea | 58.2 $\pm$ 11.1       | 61.6 $\pm$ 11.3         | 3.4                     | 0.016   |
| <i>GRB14</i>        | 8056327         | 2   | 97.5 $\pm$ 15.5       | 81.5 $\pm$ 24.1         | -15.99                  | 0.0024  | 0.041   |                     |                |                       |                         |                         |         |
| <i>HHEX</i>         | 7929282         | 10  | 427.6 $\pm$ 78.2      | 340.5 $\pm$ 77.3        | -87.03                  | 0.0002  | 0.013   |                     |                |                       |                         |                         |         |
| <i>HNF1B</i>        | 8014591         | 17  | 193.1 $\pm$ 53.2      | 154.7 $\pm$ 48.4        | -38.38                  | 0.0005  | 0.017   |                     |                |                       |                         |                         |         |
| <i>ITGB6</i>        | 8056184         | 2   | 790.1 $\pm$ 379.4     | 623.3 $\pm$ 250.2       | -166.88                 | 0.0012  | 0.027   |                     |                |                       |                         |                         |         |
| <i>KIF11</i>        | 7929258         | 10  | 27.4 $\pm$ 7.0        | 17.8 $\pm$ 4.3          | -9.60                   | 0.0005  | 0.017   |                     |                |                       |                         |                         |         |
| <i>MAEA</i>         | 8093462         | 4   | 541.4 $\pm$ 29.9      | 512.1 $\pm$ 32.2        | -29.38                  | 0.0012  | 0.027   |                     |                |                       |                         |                         |         |
| <i>NOTCH2</i>       | 7919095         | 1   | 381.1 $\pm$ 126.7     | 281.3 $\pm$ 105.9       | -99.81                  | 0.0002  | 0.013   |                     |                |                       |                         |                         |         |
| <i>PTPRD</i>        | 8160040         | 9   | 64.9 $\pm$ 17.7       | 57.1 $\pm$ 16.7         | -7.85                   | 0.0024  | 0.041   |                     |                |                       |                         |                         |         |
| <i>SLC30A8</i>      | 8148003         | 8   | 5,399.1 $\pm$ 1,886.6 | 4,762.5 $\pm$ 1,777.0   | -636.61                 | 0.0034  | 0.049   |                     |                |                       |                         |                         |         |
| <i>SLC44A3</i>      | 7903144         | 1   | 316.4 $\pm$ 76.9      | 260.8 $\pm$ 68.5        | -55.59                  | 0.0034  | 0.049   |                     |                |                       |                         |                         |         |
| <i>TCF7L2</i>       | 7930537         | 10  | 215.1 $\pm$ 30.9      | 180.2 $\pm$ 28.9        | -34.89                  | 0.0002  | 0.013   | cg26775558          | Body; Open sea | 56.5 $\pm$ 10.0       | 60.4 $\pm$ 9.2          | 3.9                     | 0.006   |
| <i>TP53INP1</i>     | 8151890         | 8   | 426.4 $\pm$ 122.2     | 371.3 $\pm$ 94.1        | -55.04                  | 0.0024  | 0.041   |                     |                |                       |                         |                         |         |
| <i>TSPAN8</i>       | 7964927         | 12  | 1,740.4 $\pm$ 604.9   | 870.6 $\pm$ 550.3       | -869.75                 | 0.0002  | 0.013   |                     |                |                       |                         |                         |         |
| <i>VPS26A</i>       | 7927972         | 10  | 950.4 $\pm$ 120.1     | 858.1 $\pm$ 145.6       | -92.31                  | 0.0012  | 0.027   |                     |                |                       |                         |                         |         |
